# Supplementary material for: A network similarity integration method for predicting microRNA-disease associations
Source: Royal Society of Chemistry journal article supplement (doi:10.1039/c7ra05348g), 2017-01-01
Supplement: c7ra05348g1.pdf [file c7ra05348g1.pdf]

Supplementary Information

**Table S1** The top 50 potential microRNA-disease associations predicted by NSIM

| rank | microRNA name | disease name              | evidences        | rank | microRNA name | disease name              | evidences        |
|------|---------------|---------------------------|------------------|------|---------------|---------------------------|------------------|
| 1    | hsa-let-7a    | Breast Neoplasms          | dbDEM, miRCancer | 26   | hsa-mir-9     | Breast Neoplasms          | dbDEM            |
| 2    | hsa-mir-200c  | Breast Neoplasms          | dbDEM, miRCancer | 27   | hsa-mir-126   | Breast Neoplasms          | dbDEM, miRCancer |
| 3    | hsa-mir-218   | Breast Neoplasms          | dbDEM, miRCancer | 28   | hsa-mir-101   | Breast Neoplasms          | dbDEM, miRCancer |
| 4    | hsa-mir-200c  | Carcinoma, Hepatocellular | miRCancer        | 29   | hsa-mir-200a  | Carcinoma, Hepatocellular | dbDEM            |
| 5    | hsa-mir-145   | Breast Neoplasms          | dbDEM, miRCancer | 30   | hsa-mir-143   | Breast Neoplasms          | dbDEM, miRCancer |
| 6    | hsa-mir-125b  | Breast Neoplasms          | miRCancer        | 31   | hsa-let-7c    | Breast Neoplasms          | dbDEM, miRCancer |
| 7    | hsa-mir-17    | Neoplasms                 | dbDEM, miRCancer | 32   | hsa-mir-17    | Breast Neoplasms          | miRCancer        |
| 8    | hsa-mir-10b   | Carcinoma, Hepatocellular | miRCancer        | 33   | hsa-let-7g    | Breast Neoplasms          | dbDEM, miRCancer |
| 9    | hsa-mir-31    | Breast Neoplasms          | dbDEM, miRCancer | 34   | hsa-mir-34a   | Neoplasms                 | dbDEM, miRCancer |
| 10   | hsa-mir-20a   | Neoplasms                 | dbDEM, miRCancer | 35   | hsa-mir-19a   | Neoplasms                 | dbDEM, miRCancer |
| 11   | hsa-mir-18a   | Neoplasms                 | dbDEM, miRCancer | 36   | hsa-mir-205   | Breast Neoplasms          | dbDEM, miRCancer |
| 12   | hsa-let-7b    | Breast Neoplasms          | dbDEM, miRCancer | 37   | hsa-mir-20a   | Breast Neoplasms          | miRCancer        |
| 13   | hsa-mir-92a   | Neoplasms                 | dbDEM, miRCancer | 38   | hsa-mir-27a   | Breast Neoplasms          | dbDEM, miRCancer |
| 14   | hsa-mir-145   | Carcinoma, Hepatocellular | dbDEM, miRCancer | 39   | hsa-mir-375   | Breast Neoplasms          | dbDEM            |
| 15   | hsa-mir-10b   | Breast Neoplasms          | dbDEM, miRCancer | 40   | hsa-mir-200a  | Breast Neoplasms          | dbDEM, miRCancer |
| 16   | hsa-mir-21    | Breast Neoplasms          | dbDEM, miRCancer | 41   | hsa-mir-100   | Breast Neoplasms          | dbDEM, miRCancer |
| 17   | hsa-mir-34c   | Breast Neoplasms          | dbDEM, miRCancer | 42   | hsa-mir-92a   | Breast Neoplasms          | miRCancer        |
| 18   | hsa-let-7d    | Breast Neoplasms          | dbDEM, miRCancer | 43   | hsa-mir-21    | Neoplasms                 | dbDEM, miRCancer |
| 19   | hsa-mir-34a   | Breast Neoplasms          | dbDEM, miRCancer | 44   | hsa-mir-18a   | Breast Neoplasms          | dbDEM, miRCancer |

|    |              |                           |                  |    |              |                           |                  |
|----|--------------|---------------------------|------------------|----|--------------|---------------------------|------------------|
| 20 | hsa-mir-200b | Breast Neoplasms          | dbDEM, miRCancer | 45 | hsa-mir-143  | Carcinoma, Hepatocellular | dbDEM, miRCancer |
| 21 | hsa-let-7a   | Carcinoma, Hepatocellular | dbDEM, miRCancer | 46 | hsa-let-7f   | Breast Neoplasms          | dbDEM, miRCancer |
| 22 | hsa-mir-200b | Carcinoma, Hepatocellular | miRCancer        | 47 | hsa-mir-146a | Breast Neoplasms          | dbDEM, miRCancer |
| 23 | hsa-mir-200c | Stomach Neoplasms         | miRCancer        | 48 | hsa-mir-145  | Neoplasms                 | dbDEM, miRCancer |
| 24 | hsa-mir-125b | Neoplasms                 | dbDEM, miRCancer | 49 | hsa-let-7a   | Stomach Neoplasms         | miRCancer        |
| 25 | hsa-mir-34b  | Breast Neoplasms          | dbDEM, miRCancer | 50 | hsa-let-7e   | Breast Neoplasms          | dbDEM, miRCancer |
